# Supplementary material for: Poverty concentration in an affluent city: Geographic variation and correlates of neighborhood poverty rates in Hong Kong
Source: PLoS One. 2018 Feb 23;13(2):e0190566. doi: 10.1371/journal.pone.0190566 (PMC5825023; doi:10.1371/journal.pone.0190566)
Supplement: S2 File — (XLSX) [file pone.0190566.s002.xlsx]

## Sheet: Figure2
PovertyRate	LSB
>35%	423034,263010,291005,527002,280002,266017,294027,623006,641001,544005,281035,524027,510031,112013,754040,294034,542001,759027,754017,510029,351007,652001,519012,294015,545001,294012,265020,267003,242040,423036,229004,246011,241019,245020,266021,513001,510037,221021,221081,294056,263014,510028,221011,944001,266020,291017,510027,510025,283031,326003,221001,627005,624041,545002,
25-35%	113010,510026,221028,625015,264041,634034,628006,281010,174017,533001,544001,266024,221041,241015,944011,267019,442001,155007,243027,112003,151024,283023,265008,283025,521006,285011,283022,634007,221097,228034,165004,288010,246004,261023,294003,221002,294022,156004,327006,758010,267030,920001,324007,759039,326011,243019,297012,285018,754009,529003,225041,754002,243026,285012,976001,728016,281009,…
15-25%	723053,146013,427015,726001,820006,131009,264043,755001,225056,264001,131029,264048,245006,221009,829001,112004,235001,146007,241011,441001,722006,524009,112009,757014,324022,245008,221070,241028,281043,726027,423003,298024,759045,424012,518048,151027,757019,266022,723025,244028,624003,242028,625001,515001,161048,225048,227024,132001,261006,113009,222016,626008,531024,533006,281002,837005,350003,…
5-15%	722015,157017,245012,211017,122001,627002,113023,631008,157008,425020,950014,151025,271026,271052,729017,222006,234001,272005,157020,153021,225007,757022,133006,741022,628023,831009,627001,143001,175016,756018,264046,510009,221014,112026,144002,192018,285002,427018,221079,326017,212002,510021,423017,161004,975001,156014,153043,758024,531009,757037,971001,193001,271001,183001,246014,756001,524028,…
<5%	111003,111044,142014,144058,156006,156015,171013,175001,181001,191005,192006,192015,195002,196003,196006,254013,260004,261001,281023,284027,298009,325011,423043,426025,532019,723051,726031,729025,754042,756027,757024,820001,831022,963001,144056,759032,163021,192005,234023,217002,754046,217003,141012,753015,111018,196007,759009,756028,154001,263021,971007,723050,272003,195013,171031,327022,263020,…
